# Supplementary material for: Drug Repurposing in Oncology: A Systematic Review of Randomized Controlled Clinical Trials
Source: Cancers (Basel). 2023 May 30;15(11):2972. doi: 10.3390/cancers15112972 (PMC10251882; doi:10.3390/cancers15112972)
Supplement: Supplementary file 1 [file cancers-15-02972-s001.zip › Supplementary_material Tables.xlsx]

## Sheet: Supplemmentary material
FIRST AUTHOR	YEAR OF PUBLICATION	doi	COUNTRY	STUDY PERIOD	TRIAL SHORT NAME	CT PHASE	BLIND/ OPEN-LABEL	INTENTION	SETTING	KNOWN INDICATIONS ONCOLOGICAL	POTENTIAL NEW INDICATION IN INVESTIGATION ONCOLOGICAL	KNOWN MAIN INDICATIONS	POTENTIAL NEW INDICATION IN INVESTIGATION	DRUG	ATC CODE	ATC 4th LEVEL	ROUTE OF ADMINISTRATION	AIM OF THE STUDY	TIME FRAME	TARGET POPULATION	PREGNANT / BREAST-FEEDING	AGE OF PATIENTS	ENROLLED INDIVIDUALS (n)	INTERVENTION GROUP	SIZE INTERVENTION GROUP	CONTROL GROUP	SIZE CONTROL GROUP	LOST TO FOLLOW-UP (intervention/control)	MORTALITY (intervention/control)	OUTCOME	MAIN FINDINGS	OTHER FINDINGS	ADRs	AUTHORS' CONCLUSION	MULTIMORBIDITY ASSESSMENT	LIMITATIONS	FUNDING	QUALITY OF EVIDENCE (GRADE)	GRADE; BIAS	GRADE; INCONSISTENCY	GRADE; INDIRECTNESS	GRADE; IMPRECISION	GRADE; PUBLICATION BIAS	GRADE; EFFECT MAGNITUDE	GRADE; DOSE RESPONSE	GRADE; COFOUNDING
Drugs in investigation for use in oncological conditions
Hegazy SK	2022	10.1016/j.lfs.2022.120536	Egypt	2017-unclear		III	Double blind	Treatment	Hospital / Specialised care	No	Yes	Intestinal parasites	Metastasic colorectal cancer (stage 4)	Mebendazole	P02CA01	P02CA Benzimidazole derivatives	Oral	Anti-tumor activity and safety	12 months (mean)	Patients with metastatic colorectal cancer	No	18-65	64	Bevacizumab with FOLFOX4 plus mebendazole 500 mg twice daily, 12 weeks (six cycles)	31	Bevacizumab and FOLFOX4 plus placebo tablets twice daily, identical schedule	33	24 (11/13)	13 (5/8)	ORR, one-year OS and PFS	ORR improved 12 weeks after treatment, but was not signifficantly after 12 months; one-year OS not significantly improved; PFS varied significantly	VEGF declined 12 weeks after intervention; CEA not significantly	Gastrointestinal (abdominal pain, diarhhea; significant), biochemical alterations (AST, ALT serum creatinine, estimated creatinine clearance)	Mebendazole was well tolerated and showed anti-tumor activity	No	Small sample size, high drop-out, molecular tumor characteristics were not considered, lack of intention-to-treat analysis	No	Moderate	-1	0	0	0	0	0	0	0
Alghandour R	2021	10.1016/j.urolonc.2021.05.020	Egypt	2017-2020	MANSMED	II	Blind	Treatment	Hospital / Specialised care	No	Yes	Type 2 diabetes mellitus	Hormone-sensitive prostate cancer	Metformin	A10BA02	A10BA Biguanides	Oral	Efficacy and safety	22 months (mean)	Patients with locally advanced and metastatic hormone-sensitive prostate cancer	No	≥18	124	Standard of care plus metformin 850 mg once daily for 1 month; then, twice daily	62	Standard of care	62	5 (2/3)	31 (13/18)	CRPC-free survival	The median CRPC-free survival in the metformin vs the standard of care arm was 29 months (95% CI 25-33) vs 20 months (95% CI 16-24) respectively (p=0.01). In patients with metastatic disease, there was no difference between both groups, with a median of 21 months (95% CI 15-29) vs 15 months (95% CI 12-20) respectively (P = 0.15)	No significant difference in OS (p=0.14) or PSA response (p=0.5)	Gastrointestinal (diarhea; significant vs control group), fatigue, diabetes mellitus	The addition of metformin to the standard of care could prolong the CRPC-FS in locally advanced and metastatic Hormone-sensitive prostate cancer. Patients with high-risk localized disease, regional lymph node metastases, and those with metastatic low tumor volume disease seem to derive most of the benefit	No	Control group was not placebo controlled, heterogenous population with heterogenous interventions (as standards of care)	No	Moderate	-1	0	0	0	0	0	0	0
Marrone KA	2018	10.1634/theoncologist.2017-0465	USA	2012-2015		II	Open-label	Treatment	Hospital / Specialised care	No	Yes	Type 2 diabetes mellitus	Advanced or metastatic nonsquamous NSCLC	Metformin	A10BA02	A10BA Biguanides	Oral	Efficacy and safety	12 months	Patients with chemotherapy-naive advanced or metastatic nonsquamous NSCLC	No	≥18	25	Chemotherapy plus metformin 1000 mg twice daily	19	Chemotherapy alone	6			One-year PFS, OS, safety, response rate	Significant benefit in PFS with the use of metformin (9.6 months vs 6.7 months, p=0.024), OS was not significantly different		Decreased neutrophil, lymphocyte, and whice bllod cells count, vomiting, dehydration, hypertension. No ADRs due to metformin ocurred.	Metformin is a well tolerated drug that in addition to standard chemotherapy can improve progression free survival	No	Small sample size, the study was stopped because of changes in practice patterns for treatment, lack of correlative analyses evaluating potential mechanistic effects	Yes	Moderate	-1	0	0	0	0	0	0	0
Knight JM	2018	10.1186/s12885-018-4509-0	USA	2015-2017		II	Open-label	Treatment	Hospital / Specialised care	No	Yes	Hypertension, cardiac disease	Multiple myeloma	Propranolol	C07AA05 propranolol	C07AA Beta blocking agents, non-selective	Oral	Efficacy	100 days	Patients receiving an autologous hematopoietic stem cell transplant for multiple myeloma	No	18-75	25	Propranolol 20 twice daily starting 7 days before transplantation until day 28 post-transplant	12	No propranolol	13			Feasibility, enrollment rate, tolerability, MA, retention	Enrollment rate 16%, no serious ADRs were reported, MA 94%		Hypotension, dizziness, maculopapular rash, hypokalemia, hypertension, chest pain	It is feasible to recruit and treat multiple myeloma patientscwith propranolol during HCT, with the greatest obstacle being other competing oncology trials	No	Small sample size	Yes	Moderate	-1	0	0	0	0	0	0	0
Taghizadeh Kermani A	2018	10.1002/jcp.27177	Iran	2016-2018		II	Blind	Treatment	Hospital / Specialised care	No	Yes	Anticoagulant for thromboembolic disease	Esophageal cancer	Low molecular weight heparin	B01AB01	B01AB Heparin group	Subcutaneous	Efficacy and safety	7 months	Patients with squamous cell carcinoma of esophagus who met the eligibility criteria for neoadjuvant chemoradiation and definitive esophagectomy	No	≥18	69	Neoadjuvant chemoradiation plus enoxaparin sodium 40 mg/0.2 ml	37	Neoadjuvant chemoradiation alone	32			Clinical response, pathological response, and residual staging	Integration of enoxaparin into chemoradiation protocol is safe and tolerable. However, higher probability of neutropenia was reported in the patients treated with enoxaparin		Neutropenia	The clinical and pathological response of squamous cell carcinoma of the esophagus to the neoadjuvant chemoradiation was improved by the addition of enoxaparin to the treatment, although the difference was not significant	No	Small sample size and no information about anti-Xa levels	Yes	Moderate	-1	0	0	0	0	0	0	0
Shaashua L	2017	10.1158/1078-0432.CCR-17-0152	Israel	2014-2016		II	Double blind	Treatment	Hospital / Specialised care	No	Yes	Beta-blocker (hypertension, cardiac disease) and NSAID (rheumatoid arthritis, osteoarthritis)	Primary operable breast cancer	Propranolol and etodolac	C07AA05 propranolol; M01AB08 etodolac	C07AA Beta blocking agents, non-selective; M01AB Acetic acid derivatives and related substances	Oral	Efficacy and safety	16 days (mean)	Women with breast cancer stage I-III	No	20-70	38	Etodolac 400 mg plus propranolol 20 mg twice daily for 11 days starting 5 days before tumor resection (dosis for propranolol on the day of tumor resection and the following morning was 80 mg twice)	19	Placebo; identical schedule	19	2 (1/1)		Tumor gene expression profiling, prometastatic biomarkers	Decreased epithelial-to-mesenchymal transition, reduced activity of prometastatic/proinflammatory transcription factors, and decreased tumor-infiltrating monocytes while increasing tumor-infiltrating B cells		Nausea. No serious or moderate adverse events were observed	Perioperative inhibition of COX-2 and b-adrenergic signaling provides a safe and effective strategy for inhibiting multiple cellular and molecular pathways related to metastasis and disease recurrence in early-stage breast cancer	No	No information about long-term clinical outcomes	Yes	High	0	0	0	0	0	0	0	0
Kordes S	2015	10.1016/S1470-2045(15)00027-3	Netherlands	2010-2014		II	Open-label	Treatment	Hospital / Specialised care	No	Yes	Type 2 diabetes mellitus	Pancreatic adenocarcinoma	Metformin	A10BA02	A10BA Biguanides	Oral	Efficacy and safety	6 months	Patients with metastatic or unresectable locally advanced pancreatic adeno carcinoma	No	≥18	121	Gemcitabine and erlotinib plus metformin 1000 mg twice daily	60	Gemcitabine and erlotinib plus placebo; identical schedule	61		5 (3/2)	Six-months OS, PFS, toxicity, ADRs	OS at 6 months was 63.9% (95% CI 51.9–75.9) in the placebo group and 56.7% (44.1–69.2) in the metformin group (p=0.41). Median OS was 7.6 months (95% CI 6·1–9·1) in the placebo group and 6.8 months (5·1–8·5) in the metformin group (hazard ratio 1.056 [95% CI 0.72–1.55])	Median PFS was 5.4 months (95% CI 5.0–5.8) in the placebo group and 4·1 months (1.8–6.5) in the metformin group (HR 1.18; 95% CI 0.77–1.82	Gastrointestinal events	No advantage for the addition of metformin to erlotinib and gemcitabine in the treatment of advanced pancreatic cancer	No	No information on tumor biomarkers, patient heterogeneity	Yes	Moderate	-1	0	0	0	0	0	0	0
Protocols
Zeyen T	2022	10.1186/s13063-021-05977-0	Germany	Recruitment: 2021-2024	MecMeth/NOA-24	II	Open-label	Treatment	Hospital / Specialised care	No	Yes	NSAID (Rheumatoid arthritis, osteoarthritis, etc.)	Progressive MGMT-methylated glioblastoma	Meclofenamate	M01AG04	M01AG Fenamates	Oral	Efficacy, safety, tolerability, and quality of life	6 months	Patients with MGMT promotor-methylated wildtype glioblastoma	No	>18	60	Meclofenamate treatment plus temozolomide standard therapy, maximum 224 days (eight 4-week courses)	30	Temozolomide standard therapy	30			OS, PFS, ADRs, QoL					No		Yes
McCarthy C	2021	10.1186/s13063-021-05373-8	UK	2019-2023	SAVER	II	Open-label	Prevention	Hospital / Specialised care	No	Yes	Epilepsy	High-risk oral epithelial dysplasia	Sodium valproate	N03AG01	N03AG Fatty acid derivatives	Oral	Clinical activity, mechanism of action, and study feasibility	6 months	Patients with a biopsy confirming a histopathological diagnosis of oral epithelial dysplasia, considered to be at high risk of transforming to oral cancer	No	≥18	110	Sodium valproate 500 mg once daily for 14 days; then, 500 mg twice daily until four calendar months after day 1	73	Observation only	37			Changes in lesion size, changes in histological grade, and loss of heterozygosity					No		Yes
Hüttner FJ	2020	10.1136/bmjopen-2020-040406	Germany	2018-2021	PROSPER	II	Blind	Treatment	Hospital / Specialised care	No	Yes	Beta-blocker (hypertension, cardiac disease) and NSAID (rheumatoid arthritis, osteoarthritis, etc.)	Elective pancreatic head resection (perioperative)	Propranolol and etodolac	C07AA05 propranolol; M01AB08 etodolac	C07AA Beta blocking agents, non-selective; M01AB Acetic acid derivatives and related substances	Oral	Safety, feasibility, and early parameters of efficacy	24 months	Patients with resectable carcinoma of the pancreatic head planned for pancreatoduodenectomy	No	≥18	100	Etodolac 400 mg twice daily for 25 days (starting 10 days preoperatively) plus propranolol 20 mg twice daily for 10 days preoperatively, 40 mg the day of surgery and 1 week after; then, 20 mg twice daily for the second postoperative week	50	Placebo; identical schedule	50			Serious ADRs, post-operative mortality, pancreas-associated morbidity, MA, OS, DFS, rates of local and distant recurrence					No		Yes
Polster SP	2019	10.1093/neuros/nyy539	USA	2018-ongoing	AT CASH EPOC	I/II	Double blind	Treatment	Hospital / Specialised care	No	Yes	Hypercholesterolemia	Cavernous angiomas	Atorvastatin	C10AA05	C10AA HMG CoA reductase inhibitors	Oral	Efficacy	24 months	Patients with cavernous angiomas	No	18-80	80	Atorvastatin 80 or 40 mg daily	40	Placebo; identical schedule	40			Change in QSM per year using an intention to treat analysis, vascular permeability, ADRs					No		Yes
Jakola AS	2018	10.12688/f1000research.16786.1	Norway, Sweden	2017-ongoing	DIRECT	II/III	Open-label	Treatment	Hospital / Specialised care	No	Yes	Alcoholism	Recurrent glioblastoma	Disulfiram	N07BB01, P03AA04	N07BB Drugs used in alcohol dependence, P03AA Sulfur containing products	Oral	Efficacy, safety, health-related quality of life	24 months	Patients withfirst recurrence of glioblastoma	No	≥18	142	Disulfiran 400 mg once daily with nutritional 2.5 mg copper supplement plus alkylating chemotherapy	71	Alkylating chemotherapy alone	71			Six-months survival (primary endpoint), OS, PFS, safety, health-related QoL					No		Yes
Antineoplastic agents in investigation for use in non-oncological conditions
Aman J	2021	10.1016/S2213-2600(21)00237-X	Netherlands	2020-2021	CounterCovid Study	II	Double blind	Treatment	Hospital / Specialised care	Yes	No	Leukaemia, myelodysplastic or myeloproliferative diseases, advanced hypereosinophilic syndrome, gastrointestinal stromal tumours, dermatofibrosarcoma protuberans	Covid-19 with hypoxic respiratory failure	Imatinib	L01EA01	L01EA BCR-ABL tyrosine kinase inhibitors	Oral	Efficacy and safety	28 days	Patients with SARS-CoV-2 infection and hypoxic respiratory failure	No	≥18	400	Imatinib 800 mg loading dose on day 1, followed by 400 mg once daily, for 9 days	204	Placebo; identical schedule	196	15 (7/8)	42 (15/27)	Time to discontinuation of ventilation and supplemental oxygen for more than 48 consecutive hours while being alive	No significant differences between intervention and control group regarding time to discontinuation of supplemental oxygen and mechanical ventilation (HR 1.07, 95% CI 0.62–1.84; p=0.82; adjusted for baseline characteristics)	HRs for mortality (0.52, 95% CI 0.26–1.05; p=0·068) and need for mechanical ventilation (1.02, 95% CI 0.80–1.30, p=0.87) were not significant after adjusting for baseline characteristics.	Thromboembolic events, decreased lymphocyte counts, alkalosis, hyperglycaemia, ARDS. No significant differences between the two groups (15.9 vs 13.9 months, p=0.186).	Imatinib did not reduce the time to discontinuation of ventilation and supplemental oxygen for more than 48 consecutive hours in patients with COVID-19 requiring supplemental oxygen	Yes	Loss to follow-up (partly due to hospital relocations during the pandemics), imbalances in sex baseline clinical characteristics (comorbidities), the treatment period of ten days was based on earlier observations and might need to be reconsidered	Yes	High	0	0	0	0	0	0	0	0
Protocols
Atmowihardjo L	2022	10.1186/s13063-022-06055-9	Netherlands	2021-2022	INVENT COVID	II	Double blind	Treatment	Hospital / Specialised care	Yes	No	Leukaemia, myelodysplastic or myeloproliferative diseases, advanced hypereosinophilic syndrome, gastrointestinal stromal tumours, dermatofibrosarcoma protuberans	Covid-19 with acute distress respiratory syndrome	Imatinib mesylate	L01EA01	L01EA BCR-ABL tyrosine kinase inhibitors	Intravenous	Efficacy, safety, and tolerability	28 days	Patients with acute respiratory distress syndrome induced by covid-19	No	≥18	90	Imatinib 200 mg (100 mg/h, 12.5 ml/h) twice daily for up to 7 days	45	Placebo 25 ml (12.5 ml/h) for up to 7 days	45			Change in Extravascular Lung Water Index between baseline (day 1) and day 4, SOFA score, 28-day mortality, ADRs					No		Yes
Butler T	2021	10.1016/j.cct.2021.106488	USA	Recruiting	LUCINDA	II	Double blind	Treatment	Hospital / Specialised care	Yes	No	Prostate cancer, endometriosis	Alzheimer's disease	Leuprolide	L02AE02	L02AE Gonadotropin releasing hormone analogues	Subcutaneous	Efficacy	52 weeks	Women with Alzheimer's disease or Mild Cognitive Impairment due to Alzheimer's disease who are also taking donepezil	No	>65	150	Leuprolide 22.5 mg every 12 weeks, for 48 weeks	75	Placebo; identical schedule	75			Change in cognition from baseline to post-treatment as measured by the ADAS-Cog					No		Yes
Emadi A	2020	10.1186/s13063-020-04819-9	USA	Recruitment: 2020-2021		III	Blind	Treatment	Hospital / Specialised care	Yes	No	Leukaemia, myelodysplastic or myeloproliferative diseases, advanced hypereosinophilic syndrome, gastrointestinal stromal tumours, dermatofibrosarcoma protuberans	Covid-19	Imatinib	L01EA01	L01EA BCR-ABL tyrosine kinase inhibitors	Oral	Efficacy, safety, tolerability, and pharmacokinetics	60 days	Patients with SARS-CoV-2 infection	No	≥18	204	Imatinib 400 mg daily for 14 days plus best conventional care	102	Placebo (identical schedule) plus best conventional care	102			Proportion of patients with a two-point improvement at day 14 from baseline using a 8-category ordinal scale, all-cause mortality at day 28 and at day 60					No		Yes
List of abbreviations:
ADAS-Cog, Alzheimer’s Disease Assessment Scale–Cognitive subscale
ADRs, adverse drug reactions
ALT, alanine transaminase
ARDS, acute respiratory distress syndrome
AST, aspartate transaminase
CEA, carcinoembryonic antigen
CI, confidence interval
COX, cyclooxygenase
CRPC, castration-resistant prostate cancer
DFS, disease-fee survival
QoL, quality of life
QSM, quantitative susceptibility mapping
HMG-CoA, 3-hydroxy-3-methylglutaryl-coenzyme A
HR, hazard ratio
MA, medication adherence
MGMT, O-6-methylguanine-DNA methyltransferase
NSAID, non-steroidal anti-inflammatory drugs
NSCLC, non-small-cell lung cancer
ORR, overall response rate
OS, overall survival
PFS, progression-free survival
PSA, prostate-specific antigen
SARS-CoV-2, severe acute respiratory syndrome coronavirus 2
SOFA, Sequential Organ Failure Assessment
VEGF, vascular endothelial growth factor
